# Supplementary material for: EthA/R-Independent Killing of Mycobacterium tuberculosis by Ethionamide
Source: Front Microbiol. 2017 Apr 25;8:710. doi: 10.3389/fmicb.2017.00710 (PMC5403819; doi:10.3389/fmicb.2017.00710)
Supplement: Supplementary file 1 [file Table_1.doc]

**Supplemental Information**

**EthA/R-independent killing of *Mycobacterium tuberculosis* by ethionamide**

**Running Title:** EthA/R-independent killing by ethionamide

**Authors:** Michelle Lay Teng Ang1,2, Siti Zarina Zainul Rahim1,2, Paola Florez de Sessions3, Wenwei Lin1,2, Vanessa Koh1,2, Kevin Pethe4, Martin Lloyd Hibberd3,5 and Sylvie Alonso1,2*.

**Affiliations:** 1Department of Microbiology and Immunology, Yong Loo Lin School of Medicine, 2Immunology programme, Life Sciences Institute, National University of Singapore, 3Genome Institute of Singapore, 4Lee Kong Chian School of Medicine and School of Biological Sciences, Nanyang Technological University, Singapore, 5Department of Pathogen Molecular Biology, London School of Hygiene & Tropical Medicine, UK.

*Correspondence:

Sylvie Alonso

[micas@nus.edu.sg](mailto:micas@nus.edu.sg); Fax: +65 67782684.

**
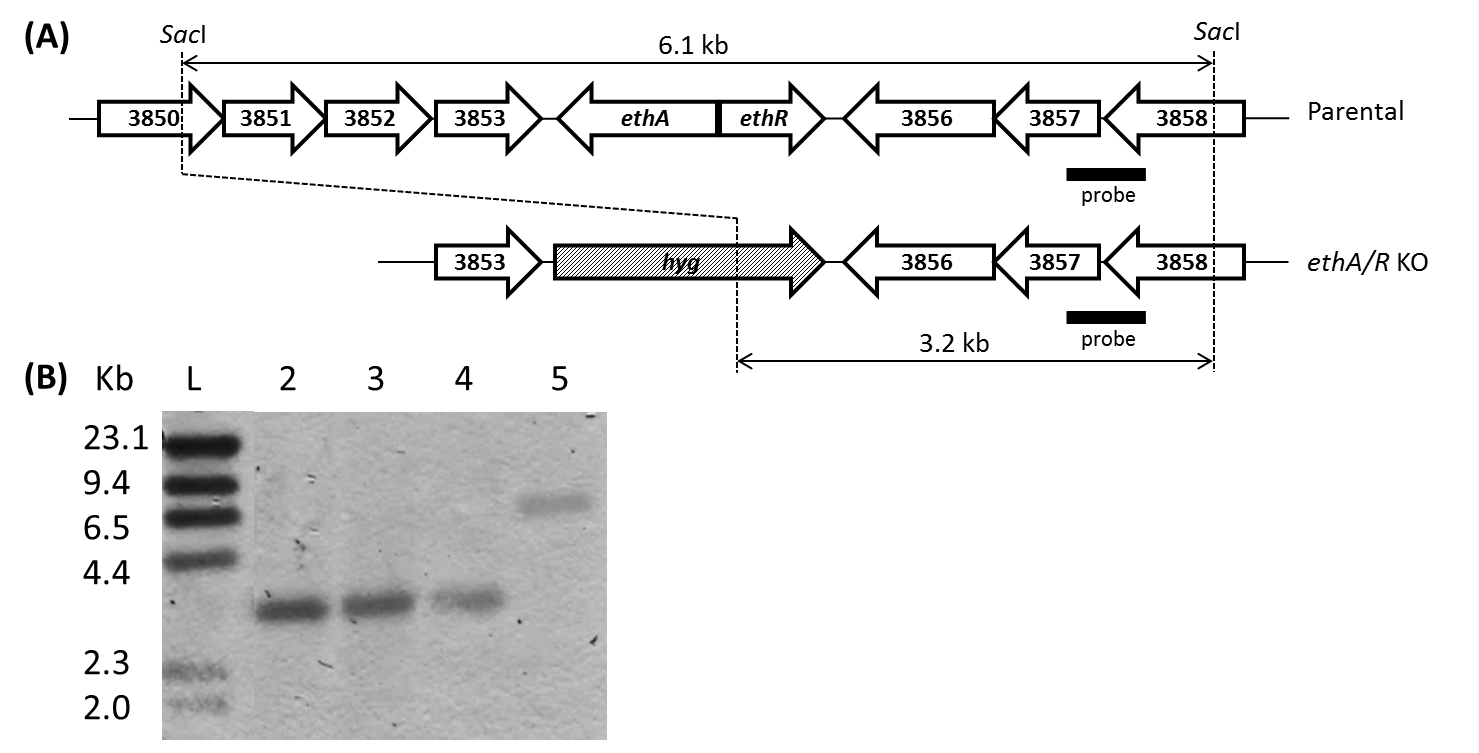
**

**Figure S1: Construction of *ethA/R* KO mutants in BCG, MTB Erdman, H37Rv and CDC1551.**

A) Chromosomal organization of *ethA/R* is identical in BCG and the three MTB backgrounds. The arrows depict the lengths and directions of *ethA*, *ethR* and their neighbouring genes. Black bar corresponds to the probe used for Southern Blot analysis. B) Southern Blot analysis of chromosomal DNA. L, DNA Molecular Ladder; 1, BCG *ethA/R* KO; 2, MTB Erdman *ethA/R* KO; 3, MTB H37Rv *ethA/R* KO; 4, MTB CDC1551 *ethA/R* KO ; 5, BCG WT.


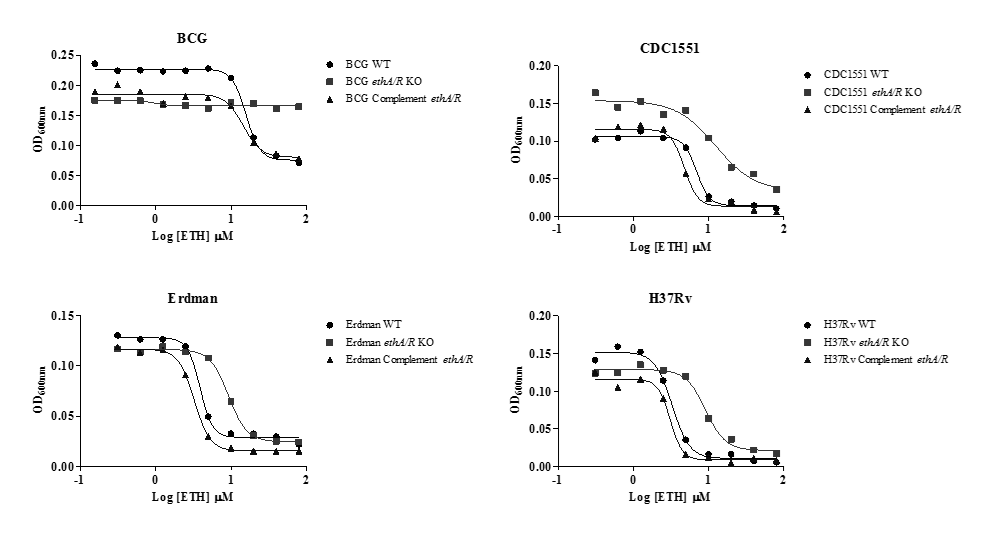


**Figure S2:** **Minimum Inhibitory Concentrations (MIC) of Ethionamide (ETH) and other drugs on *ethA/R* KO mutants.**

The assay was performed in 7H9-ADS. OD600 values were measured after 5 days incubation at 37oC. “BCG/CDC1551/Erdman/H37Rv complement” refers to *ethA/R* KO BCG/CDC1551/Erdman/H37Rv complemented with *ethA/R*.


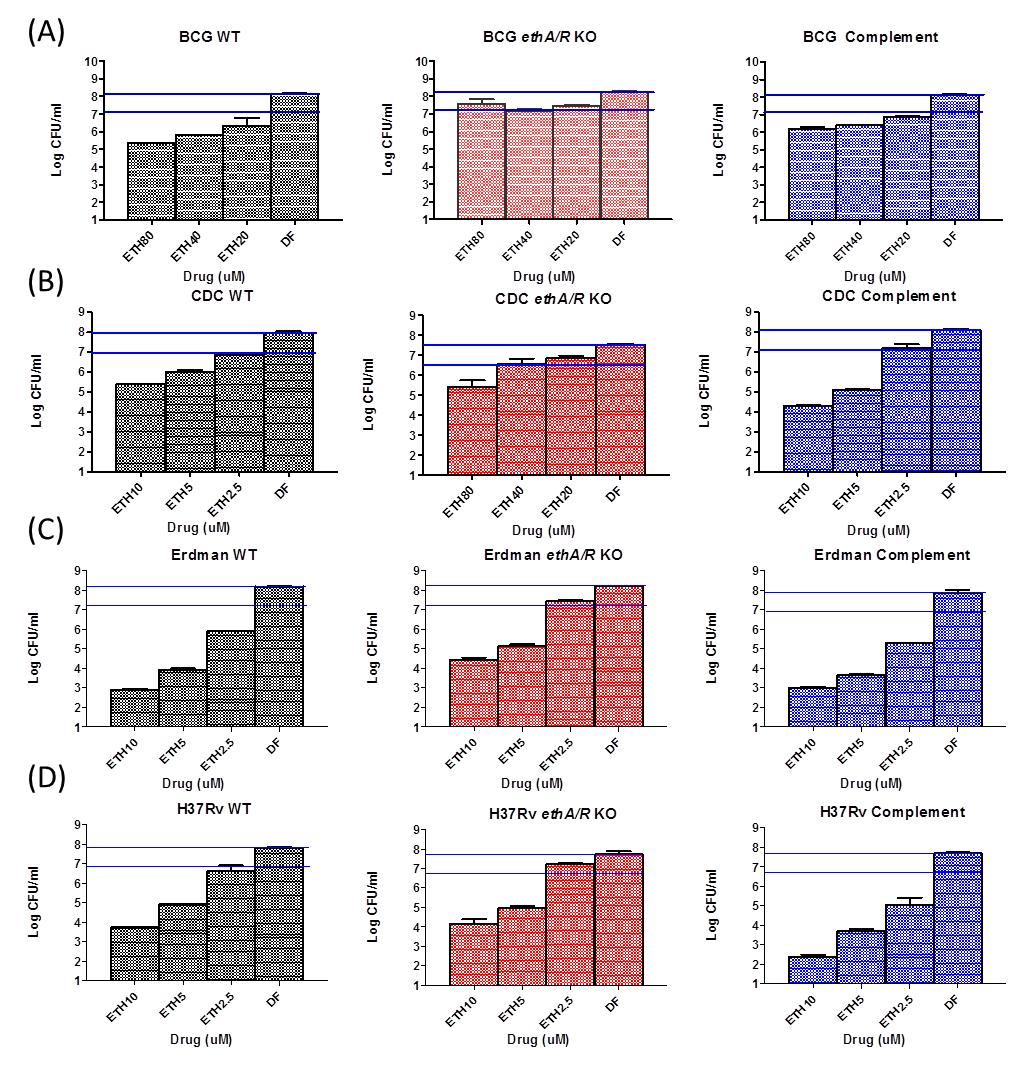


**Figure S3: CFU-based MIC90 of ETH on *ethA/R* KO mutants.**

BCG (A) or MTB (B-D) suspensions were incubated for 5 days in the presence of the indicated ETH concentrations and then plated onto 7H11 agar for colony counting after 16 days incubation. Horizontal lines represent 1 log reduction in CFU compared to the drug-free (DF) control. “BCG/CDC1551/Erdman/H37Rv complement” refers to *ethA/R* KO BCG/CDC1551/Erdman/H37Rv complemented with *ethA/R*.


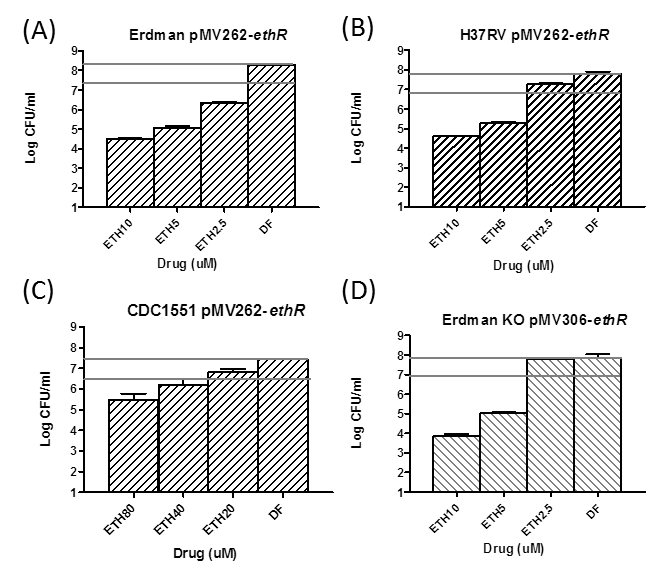


**Figure S4: CFU-based MIC90 of ETH on *ethA/R* KO mutants expressing *ethR*.**

Same legend as in Figure S3. *EthR* was over-expressed (pMV262-*ethR* construct) in Erdman (A), H37Rv (B) and CDC1551 (C) WT strains. *EthR* was expressed at parental level (pMV306-e*thR* construct) in the *ethA/R* KO Erdman strain (D).

**
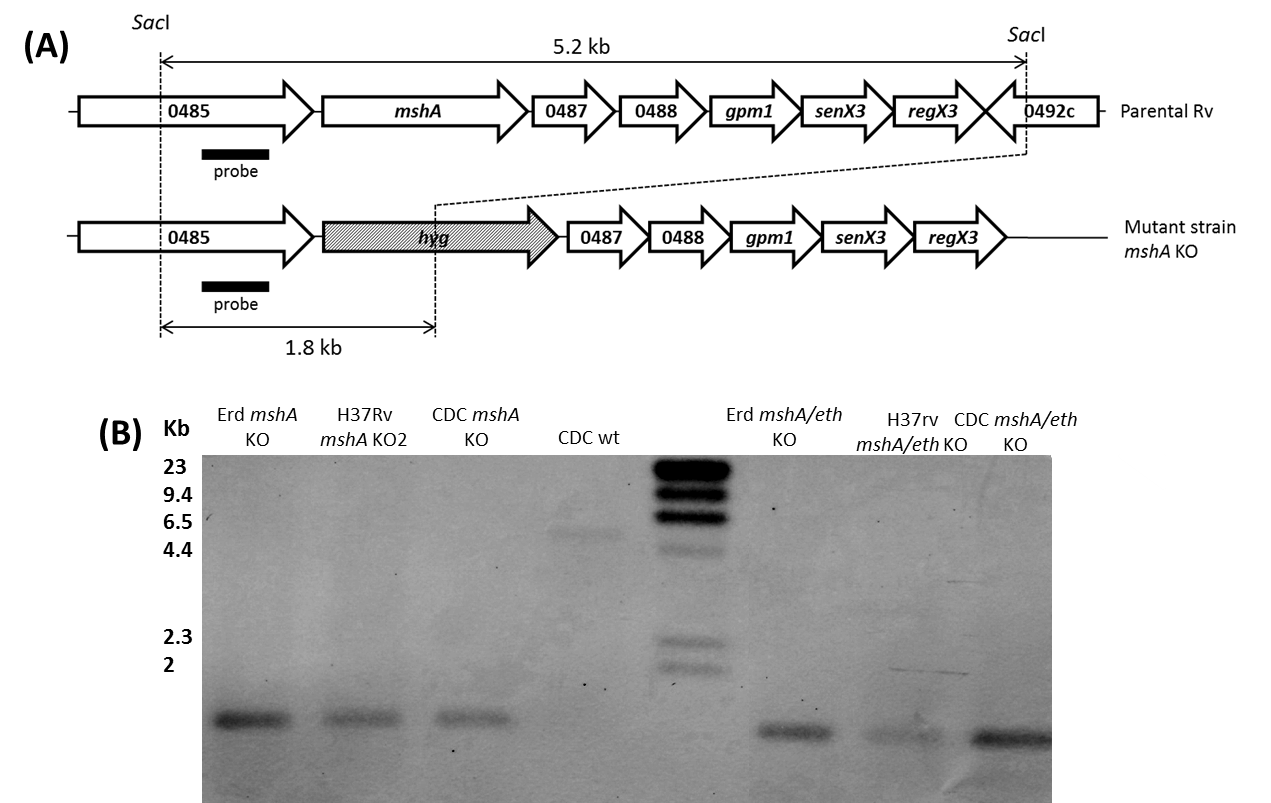
**

**Figure S5: Construction of *mshA* KO and *mshA/ethA/R* double KO mutants in MTB Erdman, MTB H37RV and MTB CDC1551**

A) Chromosomal organization of *mshA* was identical in the three MTB backgrounds. The arrows depict the lengths and directions of *mshA* and its neighbouring genes. Black bar corresponds to the probe used for Southern Blot analysis. B) Southern Blot analysis of chromosomal DNA. 1, MTB Erdman *mshA* KO; 2, MTB H37Rv *mshA* KO; 3, MTB CDC1551 *mshA* KO; 4, MTB CDC1551 WT ; L, DNA Molecular Ladder; 5, MTB Erdman *mshA/ethA/R* double KO; 6, MTB H37Rv *mshA/ethA/R* double KO; 3, MTB CDC1551 *mshA/ethA/R* double KO.

**Figure S6: ETH MIC curves on *mshA* KO and *mshA ethA/R* *(m/e)* double KO mutants.**

Drug susceptibility assay was performed in 7H9-OADC medium as described in M&M. OD600 values were read after 7 days incubation.

**Table S1: Primers used in this study.**

FP: Forward primer; RP: Reverse primer. RE: Restriction Enzyme. RE sites in primer sequences are underlined.

| **ETHR Isolate** | **Gene Name / *Gene*** | **Known Function** | **Type of Mutations** | **No. of mutations** |
| --- | --- | --- | --- | --- |
| **760C1** | Erdman_0718 / *fabD2* | Malonyl CoA-acyl carrier protein transacylase | NS- SNPs | 1 |
|  | **Erdman_3212 / -** | **Malonyl CoA-acyl carrier protein transacylase** | **NS- SNPs** | **2** |
|  | Erdman_3280 / *gltx* | Glutamyl-tRNA synthetase | NS- SNPs | 1 |
| **760C3** | Erdman_0263 / - | Transmembrane protein | NS- SNPs | 1 |
|  | Erdman_0324 / - | Transmembrane protein | NS- SNPs | 1 |
|  | **Erdman_0532 / *mshA*** | **Mannosyl transferase** | **NS- SNPs** | **1** |
|  | Erdman_0693 / *recD* | Exonuclease V alpha chain | NS- SNPs | 1 |
|  | Erdman_1821 / *argB* | Acetylglutamate kinase | NS- SNPs | 1 |
|  | Erdman_3922 / - | Transcriptional regulator | NS- SNPs | 1 |
| **760C5** | **Erdman_0532 / *mshA*** | **Mannosyl transferase** | **NS- SNPs** | **1** |
|  | Erdman_0300 / *fadE6* | Acyl-CoA dehydrogenase | NS- SNPs | 1 |
|  | Erdman_0324 / - | Transmembrane protein | NS- SNPs | 1 |
|  | Erdman_0588 / *galE3* | UDP-glucose 4-epimerase | NS- SNPs | 1 |
|  | Erdman_1484 / - | Thioredoxin | NS- SNPs | 1 |
|  | Erdman_2261 / *pks12* | Polyketide synthase | NS- SNPs | 1 |
|  | Erdman_2922 / *-* | Prophage protein | NS- SNPs | 1 |
|  | **Erdman_3212 / -** | **Malonyl CoA-acyl carrier protein transacylase** | **NS- SNPs** | **1** |
|  | Erdman_3794 / *-* | REP13E12 repeat-containing protein | NS- SNPs | 1 |
| **770A1** | **Erdman_0532 / *mshA*** | **Mannosyl transferase** | **NS- SNPs** | **1** |
|  | Erdman_0819 / *-* | Transcriptional regulator | NS- SNPs | 1 |
|  | Erdman_1488 / *glgP* | Glycogen phosphorylase | NS- SNPs | 1 |
|  | Erdman_2377 / *murE* | UDP-N-acetylmuramoylalanyl-D-glutamate-2,6-diaminopimelate ligase | NS- SNPs | 1 |
|  | Erdman_2459 / *cobD* | Cobalamin biosynthesis protein | NS- SNPs | 1 |
|  | Erdman_2997 / *recX* | Recombination regulator | NS- SNPs | 1 |
|  | **Erdman_3212 / -** | **Malonyl CoA-acyl carrier protein transacylase** | **NS- SNPs** | **2** |
|  | Erdman_3992 / *topA* | DNA topoisomerase I | NS- SNPs | 1 |
| **770A3** | **Erdman_0532 / *mshA*** | **Mannosyl transferase** | **NS- SNPs** | **1** |
|  | Erdman_1118 / *pabB* | Para-aminobenzoate synthase component I | NS- SNPs | 1 |
|  | Erdman_1647 / *moxR1* | Transcriptional regulator | NS- SNPs | 1 |
|  | Erdman_1703 / *pks5* | Polyketide synthase | NS- SNPs | 1 |
|  | Erdman_2580 / *plcB* | Membrane-associated phospholipase C | NS- SNPs | 1 |
|  | **Erdman_3212 / -** | **Malonyl CoA-acyl carrier protein transacylase** | **NS- SNPs** | **1** |
|  | Erdman_4088 / *ligC* | ATP-dependent DNA ligase | NS- SNPs | 1 |
|  | Erdman_4115 / *tyrA* | Prephenate dehydrogenase | NS- SNPs | 1 |
| **60C72** | **Erdman_0532 / *mshA*** | **Mannosyl transferase** | **INDEL** | **1** |
| **80C73** | **Erdman_0532 / *mshA*** | **Mannosyl transferase** | **INDEL** | **1** |

**Table S2: Mutations identified in spontaneous ETH-resistant mutants.**

Spontaneous ETH-resistant mutants were derived from Erdman *ethA/R* KO mutant, screened for wildtype *inhA* gene, and 7 individual mutants were fully sequenced to identify novel genes involved in ETH bio-activation. Identified mutations were restricted to INDELs and NS-SNPs. The gene list was further refined by eliminating conservative NS-SNPs. Genes in bold are highlighted to reflect recurring (but random) mutations in selected mutants. INDEL – Insertion/Deletion, NS-SNPs – non-synonymous single nucleotide polymorphisms. Gene name, gene and known function were referenced and extracted from Pubmed Genbank. (<http://www.ncbi.nlm.nih.gov/nuccore/379026087>).

|  | **7H9-ADS** | **7H9-ADS** | **7H9-OADC** | **7H9-OADC** |
| --- | --- | --- | --- | --- |
|  | INH | ETH | INH | ETH |
| **CDC1551** | 0.22 | 6.90 | 0.26 | 7.18 |
| **CDC1551 *ethA/R* KO** | 0.22 | 12.40 | 0.20 | 31.04 |
| **Erdman** | 0.15 | 3.89 | 0.18 | 3.04 |
| **CDC1551 *ethA/R* KO** | 0.11 | 9.29 | 0.18 | 19.69 |
| **H37Rv** | 0.20 | 3.30 | 0.20 | 3.30 |
| **H37Rv *ethA/R* KO** | 0.20 | 9.16 | 0.28 | 12.55 |

**Table S3: MIC50 values of INH and ETH in 7H9-ADS and 7H9-OADC in parental and *ethA/R* KO strains.**

Drug assays were set up in 96-well plates using a broth microdilution method and their OD600 values were read with a spectrophotometry microplate reader after 5-7 days. OD600 values were tabulated into PRISM for fitting of MIC curves, and MIC50 values were read from PRISM.
